# Supplementary material for: Assessment of location and energy utility options for the implementation of pyrolytic biocrude production
Source: Royal Society of Chemistry journal article supplement (doi:10.1039/d3se00745f), 2023-01-01
Supplement: d3se00745f1.pdf [file d3se00745f1.pdf]

## Supplementary Information

### Assessment of location and energy utility options for the implementation of pyrolytic biocrude production

Abhijit Dutta <sup>\*a</sup>, Michael S. Talmadge <sup>a</sup>, Eric C. D. Tan <sup>a</sup>, Joshua A. Schaidle <sup>a</sup>

\* Corresponding author. Email: abhijit.dutta@nrel.gov

<sup>a</sup> Catalytic Carbon Transformation & Scale-Up Center, National Renewable Energy Laboratory, Golden, CO, USA

### Contents

| Section | Topic                                                                    | Tables (FP for fast pyrolysis and CFP for catalytic fast pyrolysis) |
|---------|--------------------------------------------------------------------------|---------------------------------------------------------------------|
| 1       | Greenhouse gas (GHG) contributions                                       | FP: SI-1 to SI-2, CFP: SI-3 to SI-4                                 |
| 2       | Minimum selling price (MSP) breakdown and Total Capital Investment (TCI) | FP: SI-5 to SI-8, CFP: SI-9 to SI-12                                |
| 3       | Capital cost worksheets                                                  | FP: SI-13 to SI-15, CFP: SI-16 to SI-21                             |
| 4       | Unit cost assumptions for energy products                                | SI-22                                                               |
| 5       | Inventory for lifecycle analysis                                         | FP: SI-23, CFP: SI-24                                               |
| 6       | Assumptions for key emission factors                                     | SI-25                                                               |

## 1. Greenhouse gas (GHG) contributions

Table SI-1: GHG contributions for *fast pyrolysis (FP), standalone (SA)* biorefinery cases

| Case →<br>Unit →        | FP-1<br>g CO <sub>2</sub> e/MJ | FP-2<br>g CO <sub>2</sub> e/MJ | FP-3<br>g CO <sub>2</sub> e/MJ | FP-4<br>g CO <sub>2</sub> e/MJ |
|-------------------------|--------------------------------|--------------------------------|--------------------------------|--------------------------------|
| Feedstock               | 18.79                          | 18.79                          | 18.79                          | 18.79                          |
| Feedstock to colocation | -                              | -                              | -                              | -                              |
| Natural gas             | -                              | -                              | -                              | -                              |
| Catalysts & chemicals   | 0.09                           | 0.09                           | 0.09                           | 0.09                           |
| Bio-oil transport       | 1.28                           | 1.28                           | 1.28                           | 1.28                           |
| Hydrogen purchase       | -                              | -                              | -                              | -                              |
| Electricity purchase    | 2.24                           | 5.87                           | 5.59                           | 5.60                           |
| Others                  | 0.11                           | 0.11                           | 0.11                           | 0.11                           |
| Electricity export      | -                              | -                              | -                              | -                              |
| Hydrogen export         | -                              | -                              | -                              | -                              |
| Fuel gas export         | -                              | -                              | (5.09)                         | -                              |
| Steam export            | -                              | (6.36)                         | (0.58)                         | -                              |
| Chemical coproducts     | -                              | -                              | -                              | -                              |
| <b>Total</b>            | <b>22.52</b>                   | <b>19.78</b>                   | <b>20.20</b>                   | <b>25.88</b>                   |

Table SI-2: GHG contributions for *fast pyrolysis (FP), collocated (CL)* biorefinery cases

| Case →<br>Unit →        | FP-1<br>g CO <sub>2</sub> e/MJ | FP-2<br>g CO <sub>2</sub> e/MJ | FP-3<br>g CO <sub>2</sub> e/MJ | FP-4<br>g CO <sub>2</sub> e/MJ |
|-------------------------|--------------------------------|--------------------------------|--------------------------------|--------------------------------|
| Feedstock               | 18.79                          | 18.79                          | 18.79                          | 18.79                          |
| Feedstock to colocation | 1.91                           | 1.91                           | 1.91                           | 1.91                           |
| Natural gas             | -                              | -                              | -                              | -                              |
| Catalysts & chemicals   | 0.09                           | 0.09                           | 0.09                           | 0.09                           |
| Bio-oil transport       | -                              | -                              | -                              | -                              |
| Hydrogen purchase       | -                              | -                              | -                              | -                              |
| Electricity purchase    | 2.24                           | 5.87                           | 5.59                           | 5.60                           |
| Others                  | 0.11                           | 0.11                           | 0.11                           | 0.11                           |
| Electricity export      | -                              | -                              | -                              | -                              |
| Hydrogen export         | -                              | -                              | -                              | -                              |
| Fuel gas export         | -                              | -                              | (5.09)                         | -                              |
| Steam export            | -                              | (6.36)                         | (0.58)                         | -                              |
| Chemical coproducts     | -                              | -                              | -                              | -                              |
| <b>Total</b>            | <b>23.15</b>                   | <b>20.42</b>                   | <b>20.83</b>                   | <b>26.51</b>                   |

Table SI-3: GHG contributions for *catalytic fast pyrolysis (CFP), standalone (SA) biorefinery cases*

| Case →<br>Unit →        | CFP-1<br>g CO <sub>2</sub> e/MJ | CFP-2<br>g CO <sub>2</sub> e/MJ | CFP-3<br>g CO <sub>2</sub> e/MJ | CFP-4<br>g CO <sub>2</sub> e/MJ | CFP-5<br>g CO <sub>2</sub> e/MJ | CFP-6<br>g CO <sub>2</sub> e/MJ | CFP-7<br>g CO <sub>2</sub> e/MJ |
|-------------------------|---------------------------------|---------------------------------|---------------------------------|---------------------------------|---------------------------------|---------------------------------|---------------------------------|
| Feedstock               | 35.58                           | 35.58                           | 35.58                           | 35.58                           | 35.58                           | 35.58                           | 35.58                           |
| Feedstock to colocation | -                               | -                               | -                               | -                               | -                               | -                               | -                               |
| Natural gas             | -                               | -                               | -                               | -                               | -                               | -                               | -                               |
| Catalysts & chemicals   | 1.24                            | 1.24                            | 1.24                            | 1.24                            | 1.24                            | 1.24                            | 1.24                            |
| Bio-oil transport       | 0.78                            | 0.78                            | 0.78                            | 0.78                            | 0.78                            | 0.78                            | 0.78                            |
| Hydrogen purchase       | -                               | -                               | -                               | 26.07                           | 26.07                           | 26.07                           | 26.07                           |
| Electricity purchase    | -                               | -                               | 23.64                           | -                               | 20.66                           | 17.35                           | 17.49                           |
| Others                  | 0.20                            | 0.24                            | 0.22                            | 0.22                            | 0.22                            | 0.22                            | 0.22                            |
| Electricity export      | (12.60)                         | -                               | -                               | (24.55)                         | -                               | -                               | -                               |
| Hydrogen export         | -                               | (24.13)                         | (33.23)                         | -                               | -                               | -                               | -                               |
| Fuel gas export         | -                               | -                               | -                               | -                               | -                               | (68.00)                         | -                               |
| Steam export            | -                               | -                               | (32.67)                         | -                               | (75.95)                         | (10.34)                         | -                               |
| Chemical coproducts     | (7.53)                          | (7.53)                          | (7.53)                          | (7.53)                          | (7.53)                          | (7.53)                          | (7.53)                          |
| <b>Total</b>            | <b>17.66</b>                    | <b>6.18</b>                     | <b>(11.97)</b>                  | <b>31.80</b>                    | <b>1.06</b>                     | <b>(4.64)</b>                   | <b>73.85</b>                    |

Table SI-4: GHG contributions for *catalytic fast pyrolysis (CFP), collocated (CL) biorefinery cases*

| Case →<br>Unit →        | CFP-1<br>g CO <sub>2</sub> e/MJ | CFP-2<br>g CO <sub>2</sub> e/MJ | CFP-3<br>g CO <sub>2</sub> e/MJ | CFP-4<br>g CO <sub>2</sub> e/MJ | CFP-5<br>g CO <sub>2</sub> e/MJ | CFP-6<br>g CO <sub>2</sub> e/MJ | CFP-7<br>g CO <sub>2</sub> e/MJ |
|-------------------------|---------------------------------|---------------------------------|---------------------------------|---------------------------------|---------------------------------|---------------------------------|---------------------------------|
| Feedstock               | 35.58                           | 35.58                           | 35.58                           | 35.58                           | 35.58                           | 35.58                           | 35.58                           |
| Feedstock to colocation | 3.61                            | 3.61                            | 3.61                            | 3.61                            | 3.61                            | 3.61                            | 3.61                            |
| Natural gas             | -                               | -                               | -                               | -                               | -                               | -                               | -                               |
| Catalysts & chemicals   | 1.24                            | 1.24                            | 1.24                            | 1.24                            | 1.24                            | 1.24                            | 1.24                            |
| Bio-oil transport       | -                               | -                               | -                               | -                               | -                               | -                               | -                               |
| Hydrogen purchase       | -                               | -                               | -                               | 26.07                           | 26.07                           | 26.07                           | 26.07                           |
| Electricity purchase    | -                               | -                               | 23.64                           | -                               | 20.66                           | 17.35                           | 17.49                           |
| Others                  | 0.20                            | 0.24                            | 0.22                            | 0.22                            | 0.22                            | 0.22                            | 0.22                            |
| Electricity export      | (12.60)                         | -                               | -                               | (24.55)                         | -                               | -                               | -                               |
| Hydrogen export         | -                               | (24.13)                         | (33.23)                         | -                               | -                               | -                               | -                               |
| Fuel gas export         | -                               | -                               | -                               | -                               | -                               | (68.00)                         | -                               |
| Steam export            | -                               | -                               | (32.67)                         | -                               | (75.95)                         | (10.34)                         | -                               |
| Chemical coproducts     | (7.53)                          | (7.53)                          | (7.53)                          | (7.53)                          | (7.53)                          | (7.53)                          | (7.53)                          |
| <b>Total</b>            | <b>20.49</b>                    | <b>9.01</b>                     | <b>(9.14)</b>                   | <b>34.63</b>                    | <b>3.89</b>                     | <b>(1.81)</b>                   | <b>76.68</b>                    |

## 2. Minimum selling price (MSP) breakdown and Total Capital Investment (TCI)

Table SI-5: MSP breakdown (cents/GGE) and TCI for FP, standalone (SA), 2000 tonnes/day cases

| Case →                         | FP-1          | FP-2          | FP-3          | FP-4          |
|--------------------------------|---------------|---------------|---------------|---------------|
| Capital & other charges        | 69.28         | 66.36         | 64.02         | 64.12         |
| Feedstock                      | 69.51         | 69.51         | 69.51         | 69.51         |
| Natural gas                    | -             | -             | -             | -             |
| Bio-oil transport              | 30.10         | 30.10         | 30.10         | 30.10         |
| Hydrogen purchase              | -             | -             | -             | -             |
| Electricity purchase           | 4.11          | 10.75         | 10.25         | 10.26         |
| Other variable operating costs | 2.93          | 2.93          | 2.93          | 2.93          |
| Fixed operating costs          | 28.00         | 27.21         | 26.57         | 26.60         |
| Electricity export             | -             | -             | -             | -             |
| Hydrogen export                | -             | -             | -             | -             |
| Fuel gas export                | -             | -             | (1.90)        | -             |
| Steam export                   | -             | (2.84)        | (0.26)        | -             |
| Chemical coproducts            | -             | -             | -             | -             |
| <b>MSP (cents/GGE)</b>         | <b>203.93</b> | <b>204.01</b> | <b>201.22</b> | <b>203.52</b> |
| Capital & other charges        | 69.28         | 66.36         | 64.02         | 64.12         |
| Total variable operating costs | 106.65        | 113.29        | 112.79        | 112.80        |
| Fixed operating costs          | 28.00         | 27.21         | 26.57         | 26.60         |
| Total coproduct credit         | -             | (2.84)        | (2.15)        | -             |
| <b>MSP (cents/GGE)</b>         | <b>203.93</b> | <b>204.01</b> | <b>201.22</b> | <b>203.52</b> |
| <b>TCI (million \$)</b>        | <b>417</b>    | <b>399</b>    | <b>384</b>    | <b>385</b>    |

Table SI-6: MSP breakdown (cents/GGE) and TCI for FP, colocated (CL), 2000 tonnes/day cases

| Case →                         | FP-1          | FP-2          | FP-3          | FP-4          |
|--------------------------------|---------------|---------------|---------------|---------------|
| Capital & other charges        | 69.42         | 66.50         | 64.16         | 64.26         |
| Feedstock                      | 110.02        | 110.02        | 110.02        | 110.02        |
| Natural gas                    | -             | -             | -             | -             |
| Bio-oil transport              | -             | -             | -             | -             |
| Hydrogen purchase              | -             | -             | -             | -             |
| Electricity purchase           | 4.11          | 10.75         | 10.25         | 10.26         |
| Other variable operating costs | 2.93          | 2.93          | 2.93          | 2.93          |
| Fixed operating costs          | 28.00         | 27.21         | 26.57         | 26.60         |
| Electricity export             | -             | -             | -             | -             |
| Hydrogen export                | -             | -             | -             | -             |
| Fuel gas export                | -             | -             | (1.90)        | -             |
| Steam export                   | -             | (2.84)        | (0.26)        | -             |
| Chemical coproducts            | -             | -             | -             | -             |
| <b>MSP (cents/GGE)</b>         | <b>214.48</b> | <b>214.56</b> | <b>211.78</b> | <b>214.07</b> |
| Capital & other charges        | 69.42         | 66.50         | 64.16         | 64.26         |
| Total variable operating costs | 117.06        | 123.70        | 123.20        | 123.21        |
| Fixed operating costs          | 28.00         | 27.21         | 26.57         | 26.60         |
| Total coproduct credit         | -             | (2.84)        | (2.15)        | -             |
| <b>MSP (cents/GGE)</b>         | <b>214.48</b> | <b>214.56</b> | <b>211.78</b> | <b>214.07</b> |
| <b>TCI (million \$)</b>        | <b>417</b>    | <b>399</b>    | <b>384</b>    | <b>385</b>    |

Table SI-7: MSP breakdown (cents/GGE) and TCI for FP, colocated (CL), 5000 tonnes/day cases

| Case →                         | FP-1          | FP-2          | FP-3          | FP-4          |
|--------------------------------|---------------|---------------|---------------|---------------|
| Capital & other charges        | 63.73         | 61.34         | 59.68         | 59.77         |
| Feedstock                      | 110.02        | 110.02        | 110.02        | 110.02        |
| Natural gas                    | -             | -             | -             | -             |
| Bio-oil transport              | -             | -             | -             | -             |
| Hydrogen purchase              | -             | -             | -             | -             |
| Electricity purchase           | 4.11          | 10.75         | 10.25         | 10.26         |
| Other variable operating costs | 2.85          | 2.85          | 2.86          | 2.86          |
| Fixed operating costs          | 20.85         | 20.20         | 19.75         | 19.77         |
| Electricity export             | -             | -             | -             | -             |
| Hydrogen export                | -             | -             | -             | -             |
| Fuel gas export                | -             | -             | (1.90)        | -             |
| Steam export                   | -             | (2.84)        | (0.26)        | -             |
| Chemical coproducts            | -             | -             | -             | -             |
| <b>MSP (cents/GGE)</b>         | <b>201.56</b> | <b>202.32</b> | <b>200.39</b> | <b>202.68</b> |
| Capital & other charges        | 63.73         | 61.34         | 59.68         | 59.77         |
| Total variable operating costs | 116.98        | 123.62        | 123.12        | 123.13        |
| Fixed operating costs          | 20.85         | 20.20         | 19.75         | 19.77         |
| Total coproduct credit         | -             | (2.84)        | (2.15)        | -             |
| <b>MSP (cents/GGE)</b>         | <b>201.56</b> | <b>202.32</b> | <b>200.39</b> | <b>202.68</b> |
| <b>TCI (million \$)</b>        | <b>957</b>    | <b>920</b>    | <b>895</b>    | <b>896</b>    |

Table SI-8: MSP breakdown (cents/GGE) and TCI for FP, colocated (CL), 10000 tonnes/day cases

| Case →                         | FP-1          | FP-2          | FP-3          | FP-4          |
|--------------------------------|---------------|---------------|---------------|---------------|
| Capital & other charges        | 61.84         | 59.75         | 58.46         | 58.56         |
| Feedstock                      | 110.02        | 110.02        | 110.02        | 110.02        |
| Natural gas                    | -             | -             | -             | -             |
| Bio-oil transport              | -             | -             | -             | -             |
| Hydrogen purchase              | -             | -             | -             | -             |
| Electricity purchase           | 4.11          | 10.75         | 10.25         | 10.26         |
| Other variable operating costs | 2.81          | 2.81          | 2.81          | 2.81          |
| Fixed operating costs          | 18.47         | 17.90         | 17.55         | 17.58         |
| Electricity export             | -             | -             | -             | -             |
| Hydrogen export                | -             | -             | -             | -             |
| Fuel gas export                | -             | -             | (1.90)        | -             |
| Steam export                   | -             | (2.84)        | (0.26)        | -             |
| Chemical coproducts            | -             | -             | -             | -             |
| <b>MSP (cents/GGE)</b>         | <b>197.24</b> | <b>198.39</b> | <b>196.93</b> | <b>199.22</b> |
| Capital & other charges        | 61.84         | 59.75         | 58.46         | 58.56         |
| Total variable operating costs | 116.93        | 123.57        | 123.07        | 123.09        |
| Fixed operating costs          | 18.47         | 17.90         | 17.55         | 17.58         |
| Total coproduct credit         | -             | (2.84)        | (2.15)        | -             |
| <b>MSP (cents/GGE)</b>         | <b>197.24</b> | <b>198.39</b> | <b>196.93</b> | <b>199.22</b> |
| <b>TCI (million \$)</b>        | <b>1,858</b>  | <b>1,794</b>  | <b>1,755</b>  | <b>1,758</b>  |

Table SI-9: MSP breakdown (cents/GGE) and TCI for CFP, standalone (SA), 2000 tonnes/day cases

| Case →                         | CFP-1         | CFP-2         | CFP-3         | CFP-4         | CFP-5         | CFP-6         | CFP-7         |
|--------------------------------|---------------|---------------|---------------|---------------|---------------|---------------|---------------|
| Capital & other charges        | 193.41        | 196.27        | 184.23        | 180.69        | 155.64        | 140.95        | 142.72        |
| Feedstock                      | 131.59        | 131.59        | 131.59        | 131.59        | 131.59        | 131.59        | 131.59        |
| Natural gas                    | -             | -             | -             | -             | -             | -             | -             |
| Bio-oil transport              | 18.42         | 18.42         | 18.42         | 18.42         | 18.42         | 18.42         | 18.42         |
| Hydrogen purchase              | -             | -             | -             | 45.04         | 45.04         | 45.04         | 45.04         |
| Electricity purchase           | -             | -             | 37.77         | -             | 33.00         | 27.72         | 27.95         |
| Other variable operating costs | 8.25          | 8.55          | 8.60          | 8.05          | 8.05          | 8.10          | 8.10          |
| Fixed operating costs          | 66.68         | 67.39         | 64.08         | 63.10         | 56.27         | 52.25         | 52.73         |
| Electricity export             | (20.13)       | -             | -             | (39.23)       | -             | -             | -             |
| Hydrogen export                | -             | (38.53)       | (53.06)       | -             | -             | -             | -             |
| Fuel gas export                | -             | -             | -             | -             | -             | (30.92)       | -             |
| Steam export                   | -             | -             | (12.74)       | -             | (29.60)       | (4.03)        | -             |
| Chemical coproducts            | (58.15)       | (58.15)       | (58.15)       | (58.15)       | (58.15)       | (58.15)       | (58.15)       |
| <b>MSP (cents/GGE)</b>         | <b>340.07</b> | <b>325.55</b> | <b>320.75</b> | <b>349.52</b> | <b>360.26</b> | <b>330.98</b> | <b>368.42</b> |
| Capital & other charges        | 193.41        | 196.27        | 184.23        | 180.69        | 155.64        | 140.95        | 142.72        |
| Total variable operating costs | 158.27        | 158.57        | 196.39        | 203.11        | 236.11        | 230.88        | 231.11        |
| Fixed operating costs          | 66.68         | 67.39         | 64.08         | 63.10         | 56.27         | 52.25         | 52.73         |
| Total coproduct credit         | (78.29)       | (96.68)       | (123.95)      | (97.38)       | (87.75)       | (93.10)       | (58.15)       |
| <b>MSP (cents/GGE)</b>         | <b>340.07</b> | <b>325.55</b> | <b>320.75</b> | <b>349.52</b> | <b>360.26</b> | <b>330.98</b> | <b>368.42</b> |
| <b>TCI (million \$)</b>        | <b>578</b>    | <b>587</b>    | <b>547</b>    | <b>536</b>    | <b>455</b>    | <b>408</b>    | <b>413</b>    |



Table SI-10: MSP breakdown (cents/GGE) and TCI for **CFP, colocated (CL), 2000 tonnes/day** cases

| Case →                         | CFP-1         | CFP-2         | CFP-3         | CFP-4         | CFP-5         | CFP-6         | CFP-7         |
|--------------------------------|---------------|---------------|---------------|---------------|---------------|---------------|---------------|
| Capital & other charges        | 194.21        | 197.07        | 185.02        | 181.49        | 156.43        | 141.74        | 143.52        |
| Feedstock                      | 208.29        | 208.29        | 208.29        | 208.29        | 208.29        | 208.29        | 208.29        |
| Natural gas                    | -             | -             | -             | -             | -             | -             | -             |
| Bio-oil transport              | -             | -             | -             | -             | -             | -             | -             |
| Hydrogen purchase              | -             | -             | -             | 45.04         | 45.04         | 45.04         | 45.04         |
| Electricity purchase           | -             | -             | 37.77         | -             | 33.00         | 27.72         | 27.95         |
| Other variable operating costs | 8.25          | 8.55          | 8.60          | 8.05          | 8.05          | 8.10          | 8.10          |
| Fixed operating costs          | 66.68         | 67.39         | 64.08         | 63.10         | 56.27         | 52.25         | 52.73         |
| Electricity export             | (20.13)       | -             | -             | (39.23)       | -             | -             | -             |
| Hydrogen export                | -             | (38.53)       | (53.06)       | -             | -             | -             | -             |
| Fuel gas export                | -             | -             | -             | -             | -             | (30.92)       | -             |
| Steam export                   | -             | -             | (12.74)       | -             | (29.60)       | (4.03)        | -             |
| Chemical coproducts            | (58.15)       | (58.15)       | (58.15)       | (58.15)       | (58.15)       | (58.15)       | (58.15)       |
| <b>MSP (cents/GGE)</b>         | <b>399.15</b> | <b>384.62</b> | <b>379.82</b> | <b>408.60</b> | <b>419.34</b> | <b>390.05</b> | <b>427.49</b> |
| Capital & other charges        | 194.21        | 197.07        | 185.02        | 181.49        | 156.43        | 141.74        | 143.52        |
| Total variable operating costs | 216.54        | 216.84        | 254.67        | 261.39        | 294.39        | 289.16        | 289.39        |
| Fixed operating costs          | 66.68         | 67.39         | 64.08         | 63.10         | 56.27         | 52.25         | 52.73         |
| Total coproduct credit         | (78.29)       | (96.68)       | (123.95)      | (97.38)       | (87.75)       | (93.10)       | (58.15)       |
| <b>MSP (cents/GGE)</b>         | <b>399.15</b> | <b>384.62</b> | <b>379.82</b> | <b>408.60</b> | <b>419.34</b> | <b>390.05</b> | <b>427.49</b> |
| <b>TCI (million \$)</b>        | <b>578</b>    | <b>587</b>    | <b>547</b>    | <b>536</b>    | <b>455</b>    | <b>408</b>    | <b>413</b>    |

Table SI-11: MSP breakdown (cents/GGE) and TCI for **CFP, colocated (CL), 5000 tonnes/day** cases

| Case →                         | CFP-1         | CFP-2         | CFP-3         | CFP-4         | CFP-5         | CFP-6         | CFP-7         |
|--------------------------------|---------------|---------------|---------------|---------------|---------------|---------------|---------------|
| Capital & other charges        | 159.04        | 160.54        | 150.25        | 150.57        | 129.45        | 118.86        | 120.63        |
| Feedstock                      | 208.29        | 208.29        | 208.29        | 208.29        | 208.29        | 208.29        | 208.29        |
| Natural gas                    | -             | -             | -             | -             | -             | -             | -             |
| Bio-oil transport              | -             | -             | -             | -             | -             | -             | -             |
| Hydrogen purchase              | -             | -             | -             | 45.04         | 45.04         | 45.04         | 45.04         |
| Electricity purchase           | -             | -             | 37.77         | -             | 33.00         | 27.72         | 27.95         |
| Other variable operating costs | 8.10          | 8.40          | 8.46          | 7.90          | 7.90          | 7.95          | 7.95          |
| Fixed operating costs          | 46.43         | 46.76         | 43.92         | 44.02         | 38.27         | 35.37         | 35.85         |
| Electricity export             | (20.13)       | -             | -             | (39.23)       | -             | -             | -             |
| Hydrogen export                | -             | (38.53)       | (53.06)       | -             | -             | -             | -             |
| Fuel gas export                | -             | -             | -             | -             | -             | (30.92)       | -             |
| Steam export                   | -             | -             | (12.74)       | -             | (29.60)       | (4.03)        | -             |
| Chemical coproducts            | (58.15)       | (58.15)       | (58.15)       | (58.15)       | (58.15)       | (58.15)       | (58.15)       |
| <b>MSP (cents/GGE)</b>         | <b>343.58</b> | <b>327.31</b> | <b>324.75</b> | <b>358.46</b> | <b>374.20</b> | <b>350.13</b> | <b>387.57</b> |
| Capital & other charges        | 159.04        | 160.54        | 150.25        | 150.57        | 129.45        | 118.86        | 120.63        |
| Total variable operating costs | 216.39        | 216.70        | 254.52        | 261.24        | 294.24        | 289.01        | 289.24        |
| Fixed operating costs          | 46.43         | 46.76         | 43.92         | 44.02         | 38.27         | 35.37         | 35.85         |
| Total coproduct credit         | (78.29)       | (96.68)       | (123.95)      | (97.38)       | (87.75)       | (93.10)       | (58.15)       |
| <b>MSP (cents/GGE)</b>         | <b>343.58</b> | <b>327.31</b> | <b>324.75</b> | <b>358.46</b> | <b>374.20</b> | <b>350.13</b> | <b>387.57</b> |
| <b>TCI (million \$)</b>        | <b>1,163</b>  | <b>1,172</b>  | <b>1,088</b>  | <b>1,091</b>  | <b>921</b>    | <b>835</b>    | <b>850</b>    |

Table SI-12: MSP breakdown (cents/GGE) and TCI for CFP, collocated (CL), 10000 tonnes/day cases

| Case →                         | CFP-1         | CFP-2         | CFP-3         | CFP-4         | CFP-5         | CFP-6         | CFP-7         |
|--------------------------------|---------------|---------------|---------------|---------------|---------------|---------------|---------------|
| Capital & other charges        | 138.47        | 139.19        | 129.97        | 132.39        | 113.59        | 105.32        | 107.09        |
| Feedstock                      | 208.29        | 208.29        | 208.29        | 208.29        | 208.29        | 208.29        | 208.29        |
| Natural gas                    | -             | -             | -             | -             | -             | -             | -             |
| Bio-oil transport              | -             | -             | -             | -             | -             | -             | -             |
| Hydrogen purchase              | -             | -             | -             | 45.04         | 45.04         | 45.04         | 45.04         |
| Electricity purchase           | -             | -             | 37.77         | -             | 33.00         | 27.72         | 27.95         |
| Other variable operating costs | 8.01          | 8.31          | 8.37          | 7.81          | 7.81          | 7.87          | 7.87          |
| Fixed operating costs          | 37.24         | 37.36         | 34.81         | 35.50         | 30.38         | 28.11         | 28.59         |
| Electricity export             | (20.13)       | -             | -             | (39.23)       | -             | -             | -             |
| Hydrogen export                | -             | (38.53)       | (53.06)       | -             | -             | -             | -             |
| Fuel gas export                | -             | -             | -             | -             | -             | (30.92)       | -             |
| Steam export                   | -             | -             | (12.74)       | -             | (29.60)       | (4.03)        | -             |
| Chemical coproducts            | (58.15)       | (58.15)       | (58.15)       | (58.15)       | (58.15)       | (58.15)       | (58.15)       |
| <b>MSP (cents/GGE)</b>         | <b>313.73</b> | <b>296.47</b> | <b>295.26</b> | <b>331.65</b> | <b>350.36</b> | <b>329.24</b> | <b>366.68</b> |
| Capital & other charges        | 138.47        | 139.19        | 129.97        | 132.39        | 113.59        | 105.32        | 107.09        |
| Total variable operating costs | 216.30        | 216.61        | 254.43        | 261.15        | 294.15        | 288.92        | 289.15        |
| Fixed operating costs          | 37.24         | 37.36         | 34.81         | 35.50         | 30.38         | 28.11         | 28.59         |
| Total coproduct credit         | (78.29)       | (96.68)       | (123.95)      | (97.38)       | (87.75)       | (93.10)       | (58.15)       |
| <b>MSP (cents/GGE)</b>         | <b>313.73</b> | <b>296.47</b> | <b>295.26</b> | <b>331.65</b> | <b>350.36</b> | <b>329.24</b> | <b>366.68</b> |
| <b>TCI (million \$)</b>        | <b>1,992</b>  | <b>1,999</b>  | <b>1,848</b>  | <b>1,889</b>  | <b>1,586</b>  | <b>1,452</b>  | <b>1,481</b>  |

### 3. Capital cost worksheets

Please see Table 1 in the main article for applicable operations in each of the cases presented below.

*Table SI-13: Capital cost breakdown and factored estimates for the FP-1 case*

| <b>FP-1 (2,000 tons/day): Total Capital Investment in 2020\$</b> |                                   |                             |                       |
|------------------------------------------------------------------|-----------------------------------|-----------------------------|-----------------------|
| <b>Process Area</b>                                              | <b>Description</b>                | <b>Purchased Equip Cost</b> | <b>Installed Cost</b> |
| A100                                                             | Feed Handling & Drying            | \$186,275                   | \$367,136             |
| A200                                                             | Fast Pyrolysis & Vapor Upgrading  | \$59,764,778                | \$166,802,101         |
| A300                                                             | Pyrolysis Vapor Quench            | \$7,007,364                 | \$12,531,297          |
| A500                                                             | Hydrogen Plant & Fuel Combustion  | \$1,597,198                 | \$4,204,013           |
| A600                                                             | Steam System and Power Generation | \$9,696,324                 | \$18,519,094          |
| A700                                                             | Cooling Water and Other Utilities | \$4,541,020                 | \$8,956,127           |
| A800                                                             | Water Management                  | \$1,023,528                 | \$2,269,792           |
| <b>Subtotal</b>                                                  |                                   | <b>\$83,816,487</b>         | <b>\$213,649,560</b>  |
| Warehouse                                                        | 4.0% of ISBL                      |                             | \$7,188,021           |
| Site Development                                                 | 10.0% of ISBL                     |                             | \$17,970,053          |
| Additional Piping                                                | 4.5% of ISBL                      |                             | \$8,086,524           |
| <b>Total Direct Costs (TDC)</b>                                  |                                   |                             | <b>\$246,894,159</b>  |
| Prorateable Expenses                                             | 10.0% of TDC                      |                             | \$24,689,416          |
| Field Expenses                                                   | 10.0% of TDC                      |                             | \$24,689,416          |
| Home Office & Construction Fee                                   | 20.0% of TDC                      |                             | \$49,378,832          |
| Project Contingency                                              | 10.0% of TDC                      |                             | \$24,689,416          |
| Other Costs (Start-Up, Permits, etc.)                            | 10.0% of TDC                      |                             | \$24,689,416          |
| <b>Total Indirect Costs</b>                                      |                                   |                             | <b>\$148,136,496</b>  |
| <b>Fixed Capital Investment (FCI)</b>                            |                                   |                             | <b>\$395,030,655</b>  |
| Land                                                             |                                   |                             | \$1,848,000           |
| Working Capital                                                  | 5.0% of FCI                       |                             | \$19,751,533          |
| <b>Total Capital Investment (TCI)</b>                            |                                   |                             | <b>\$416,630,187</b>  |

Table SI-14: Capital cost breakdown and factored estimates for the FP-2 case

| <b>FP-2 (2,000 tons/day): Total Capital Investment in 2020\$</b> |                                       |                             |                       |
|------------------------------------------------------------------|---------------------------------------|-----------------------------|-----------------------|
| <b>Process Area</b>                                              | <b>Description</b>                    | <b>Purchased Equip Cost</b> | <b>Installed Cost</b> |
| A100                                                             | Feed Handling & Drying                | \$186,275                   | \$367,136             |
| A200                                                             | Fast Pyrolysis & Vapor Upgrading      | \$59,751,635                | \$166,767,465         |
| A300                                                             | Pyrolysis Vapor Quench                | \$7,038,718                 | \$12,632,862          |
| A500                                                             | Hydrogen Plant & Fuel Combustion      | \$1,588,508                 | \$4,181,112           |
| A600                                                             | Steam System and Power Generation     | \$3,315,895                 | \$7,843,297           |
| A700                                                             | Cooling Water and Other Utilities     | \$4,541,190                 | \$8,956,518           |
| A800                                                             | Water Management                      | \$1,023,563                 | \$2,269,854           |
| <b>Subtotal</b>                                                  |                                       | <b>\$77,445,783</b>         | <b>\$203,018,245</b>  |
|                                                                  | Warehouse                             | 4.0% of ISBL                | \$7,190,699           |
|                                                                  | Site Development                      | 10.0% of ISBL               | \$17,976,746          |
|                                                                  | Additional Piping                     | 4.5% of ISBL                | \$8,089,536           |
| <b>Total Direct Costs (TDC)</b>                                  |                                       |                             | <b>\$236,275,226</b>  |
|                                                                  | Prorateable Expenses                  | 10.0% of TDC                | \$23,627,523          |
|                                                                  | Field Expenses                        | 10.0% of TDC                | \$23,627,523          |
|                                                                  | Home Office & Construction Fee        | 20.0% of TDC                | \$47,255,045          |
|                                                                  | Project Contingency                   | 10.0% of TDC                | \$23,627,523          |
|                                                                  | Other Costs (Start-Up, Permits, etc.) | 10.0% of TDC                | \$23,627,523          |
| <b>Total Indirect Costs</b>                                      |                                       |                             | <b>\$141,765,135</b>  |
| <b>Fixed Capital Investment (FCI)</b>                            |                                       |                             | <b>\$378,040,361</b>  |
|                                                                  | Land                                  |                             | \$1,848,000           |
|                                                                  | Working Capital                       | 5.0% of FCI                 | \$18,902,018          |
| <b>Total Capital Investment (TCI)</b>                            |                                       |                             | <b>\$398,790,379</b>  |

Table SI-15: Capital cost breakdown and factored estimates for the **FP-3** case

| <b>FP-3 (2,000 tons/day): Total Capital Investment in 2020\$</b> |                                   |                             |                       |
|------------------------------------------------------------------|-----------------------------------|-----------------------------|-----------------------|
| <b>Process Area</b>                                              | <b>Description</b>                | <b>Purchased Equip Cost</b> | <b>Installed Cost</b> |
| A100                                                             | Feed Handling & Drying            | \$158,272                   | \$312,925             |
| A200                                                             | Fast Pyrolysis & Vapor Upgrading  | \$60,397,160                | \$168,468,659         |
| A300                                                             | Pyrolysis Vapor Quench            | \$7,020,602                 | \$12,491,454          |
| A500                                                             | Hydrogen Plant & Fuel Combustion  | \$64,401                    | \$164,532             |
| A600                                                             | Steam System and Power Generation | \$877,261                   | \$1,781,105           |
| A700                                                             | Cooling Water and Other Utilities | \$4,443,582                 | \$8,734,732           |
| A800                                                             | Water Management                  | \$1,026,033                 | \$2,274,289           |
| <b>Subtotal</b>                                                  |                                   | <b>\$73,987,311</b>         | <b>\$194,227,696</b>  |
| Warehouse                                                        | 4.0% of ISBL                      |                             | \$7,250,922           |
| Site Development                                                 | 10.0% of ISBL                     |                             | \$18,127,304          |
| Additional Piping                                                | 4.5% of ISBL                      |                             | \$8,157,287           |
| <b>Total Direct Costs (TDC)</b>                                  |                                   |                             | <b>\$227,763,208</b>  |
| Prorateable Expenses                                             | 10.0% of TDC                      |                             | \$22,776,321          |
| Field Expenses                                                   | 10.0% of TDC                      |                             | \$22,776,321          |
| Home Office & Construction Fee                                   | 20.0% of TDC                      |                             | \$45,552,642          |
| Project Contingency                                              | 10.0% of TDC                      |                             | \$22,776,321          |
| Other Costs (Start-Up, Permits, etc.)                            | 10.0% of TDC                      |                             | \$22,776,321          |
| <b>Total Indirect Costs</b>                                      |                                   |                             | <b>\$136,657,925</b>  |
| <b>Fixed Capital Investment (FCI)</b>                            |                                   |                             | <b>\$364,421,134</b>  |
| Land                                                             |                                   |                             | \$1,848,000           |
| Working Capital                                                  | 5.0% of FCI                       |                             | \$18,221,057          |
| <b>Total Capital Investment (TCI)</b>                            |                                   |                             | <b>\$384,490,190</b>  |

Table SI-16: Capital cost breakdown and factored estimates for the **CFP-1** case

| <b>CFP-1 (2,000 tons/day): Total Capital Investment in 2020\$</b> |                                                    |                             |                       |
|-------------------------------------------------------------------|----------------------------------------------------|-----------------------------|-----------------------|
| <b>Process Area</b>                                               | <b>Description</b>                                 | <b>Purchased Equip Cost</b> | <b>Installed Cost</b> |
| A100                                                              | Feed Handling & Drying                             | \$260,612                   | \$511,047             |
| A200                                                              | Fast Pyrolysis & Vapor Upgrading                   | \$47,958,454                | \$114,902,427         |
| A300                                                              | Pyrolysis Vapor Quench & Liquid Chemicals Recovery | \$36,590,942                | \$56,795,122          |
| A500                                                              | Hydrogen Plant & Fuel Combustion                   | \$27,214,895                | \$54,995,663          |
| A600                                                              | Steam System and Power Generation                  | \$31,702,404                | \$58,807,281          |
| A700                                                              | Cooling Water and Other Utilities                  | \$4,543,450                 | \$9,130,145           |
| A800                                                              | Water Management                                   | \$6,844,561                 | \$16,088,874          |
| <b>Subtotal</b>                                                   |                                                    | <b>\$155,115,318</b>        | <b>\$311,230,559</b>  |
|                                                                   | Warehouse                                          | 4.0% of ISBL                | \$6,888,344           |
|                                                                   | Site Development                                   | 10.0% of ISBL               | \$17,220,860          |
|                                                                   | Additional Piping                                  | 4.5% of ISBL                | \$7,749,387           |
| <b>Total Direct Costs (TDC)</b>                                   |                                                    |                             | <b>\$343,089,149</b>  |
|                                                                   | Prorateable Expenses                               | 10.0% of TDC                | \$34,308,915          |
|                                                                   | Field Expenses                                     | 10.0% of TDC                | \$34,308,915          |
|                                                                   | Home Office & Construction Fee                     | 20.0% of TDC                | \$68,617,830          |
|                                                                   | Project Contingency                                | 10.0% of TDC                | \$34,308,915          |
|                                                                   | Other Costs (Start-Up, Permits, etc.)              | 10.0% of TDC                | \$34,308,915          |
| <b>Total Indirect Costs</b>                                       |                                                    |                             | <b>\$205,853,490</b>  |
| <b>Fixed Capital Investment (FCI)</b>                             |                                                    |                             | <b>\$548,942,639</b>  |
|                                                                   | Land                                               |                             | \$1,848,000           |
|                                                                   | Working Capital                                    | 5.0% of FCI                 | \$27,447,132          |
| <b>Total Capital Investment (TCI)</b>                             |                                                    |                             | <b>\$578,237,771</b>  |

Table SI-17: Capital cost breakdown and factored estimates for the **CFP-2** case

| <b>CFP-2 (2,000 tons/day): Total Capital Investment in 2020\$</b> |                                                    |                             |                       |
|-------------------------------------------------------------------|----------------------------------------------------|-----------------------------|-----------------------|
| <b>Process Area</b>                                               | <b>Description</b>                                 | <b>Purchased Equip Cost</b> | <b>Installed Cost</b> |
| A100                                                              | Feed Handling & Drying                             | \$230,868                   | \$453,464             |
| A200                                                              | Fast Pyrolysis & Vapor Upgrading                   | \$48,111,949                | \$115,306,943         |
| A300                                                              | Pyrolysis Vapor Quench & Liquid Chemicals Recovery | \$36,815,505                | \$57,356,867          |
| A500                                                              | Hydrogen Plant & Fuel Combustion                   | \$37,786,074                | \$74,171,642          |
| A600                                                              | Steam System and Power Generation                  | \$23,175,805                | \$43,078,443          |
| A700                                                              | Cooling Water and Other Utilities                  | \$4,480,129                 | \$8,987,634           |
| A800                                                              | Water Management                                   | \$7,073,319                 | \$16,683,942          |
| <b>Subtotal</b>                                                   |                                                    | <b>\$157,673,649</b>        | <b>\$316,038,935</b>  |
|                                                                   | Warehouse                                          | 4.0% of ISBL                | \$6,924,691           |
|                                                                   | Site Development                                   | 10.0% of ISBL               | \$17,311,727          |
|                                                                   | Additional Piping                                  | 4.5% of ISBL                | \$7,790,277           |
| <b>Total Direct Costs (TDC)</b>                                   |                                                    |                             | <b>\$348,065,631</b>  |
|                                                                   | Prorateable Expenses                               | 10.0% of TDC                | \$34,806,563          |
|                                                                   | Field Expenses                                     | 10.0% of TDC                | \$34,806,563          |
|                                                                   | Home Office & Construction Fee                     | 20.0% of TDC                | \$69,613,126          |
|                                                                   | Project Contingency                                | 10.0% of TDC                | \$34,806,563          |
|                                                                   | Other Costs (Start-Up, Permits, etc.)              | 10.0% of TDC                | \$34,806,563          |
| <b>Total Indirect Costs</b>                                       |                                                    |                             | <b>\$208,839,379</b>  |
| <b>Fixed Capital Investment (FCI)</b>                             |                                                    |                             | <b>\$556,905,009</b>  |
|                                                                   | Land                                               |                             | \$1,848,000           |
|                                                                   | Working Capital                                    | 5.0% of FCI                 | \$27,845,250          |
| <b>Total Capital Investment (TCI)</b>                             |                                                    |                             | <b>\$586,598,260</b>  |



Table SI-18: Capital cost breakdown and factored estimates for the **CFP-3** case

| <b>CFP-3 (2,000 tons/day): Total Capital Investment in 2020\$</b> |                                                    |                             |                       |
|-------------------------------------------------------------------|----------------------------------------------------|-----------------------------|-----------------------|
| <b>Process Area</b>                                               | <b>Description</b>                                 | <b>Purchased Equip Cost</b> | <b>Installed Cost</b> |
| A100                                                              | Feed Handling & Drying                             | \$224,763                   | \$441,647             |
| A200                                                              | Fast Pyrolysis & Vapor Upgrading                   | \$48,174,010                | \$115,470,495         |
| A300                                                              | Pyrolysis Vapor Quench & Liquid Chemicals Recovery | \$36,873,495                | \$57,539,753          |
| A500                                                              | Hydrogen Plant & Fuel Combustion                   | \$41,202,152                | \$80,318,801          |
| A600                                                              | Steam System and Power Generation                  | \$5,392,527                 | \$12,984,692          |
| A700                                                              | Cooling Water and Other Utilities                  | \$4,456,303                 | \$8,933,998           |
| A800                                                              | Water Management                                   | \$7,181,738                 | \$16,963,611          |
| <b>Subtotal</b>                                                   |                                                    | <b>\$143,504,988</b>        | <b>\$292,652,997</b>  |
| Warehouse                                                         | 4.0% of ISBL                                       |                             | \$6,938,076           |
| Site Development                                                  | 10.0% of ISBL                                      |                             | \$17,345,190          |
| Additional Piping                                                 | 4.5% of ISBL                                       |                             | \$7,805,335           |
| <b>Total Direct Costs (TDC)</b>                                   |                                                    |                             | <b>\$324,741,597</b>  |
| Prorateable Expenses                                              | 10.0% of TDC                                       |                             | \$32,474,160          |
| Field Expenses                                                    | 10.0% of TDC                                       |                             | \$32,474,160          |
| Home Office & Construction Fee                                    | 20.0% of TDC                                       |                             | \$64,948,319          |
| Project Contingency                                               | 10.0% of TDC                                       |                             | \$32,474,160          |
| Other Costs (Start-Up, Permits, etc.)                             | 10.0% of TDC                                       |                             | \$32,474,160          |
| <b>Total Indirect Costs</b>                                       |                                                    |                             | <b>\$194,844,958</b>  |
| <b>Fixed Capital Investment (FCI)</b>                             |                                                    |                             | <b>\$519,586,556</b>  |
| Land                                                              |                                                    |                             | \$1,848,000           |
| Working Capital                                                   | 5.0% of FCI                                        |                             | \$25,979,328          |
| <b>Total Capital Investment (TCI)</b>                             |                                                    |                             | <b>\$547,413,883</b>  |

Table SI-19: Capital cost breakdown and factored estimates for the **CFP-4** case

| <b>CFP-4 (2,000 tons/day): Total Capital Investment in 2020\$</b> |                                                    |                             |                       |
|-------------------------------------------------------------------|----------------------------------------------------|-----------------------------|-----------------------|
| <b>Process Area</b>                                               | <b>Description</b>                                 | <b>Purchased Equip Cost</b> | <b>Installed Cost</b> |
| A100                                                              | Feed Handling & Drying                             | \$281,697                   | \$551,866             |
| A200                                                              | Fast Pyrolysis & Vapor Upgrading                   | \$47,833,537                | \$114,573,226         |
| A300                                                              | Pyrolysis Vapor Quench & Liquid Chemicals Recovery | \$36,428,959                | \$56,368,237          |
| A500                                                              | Hydrogen Plant & Fuel Combustion                   | \$6,292,757                 | \$16,575,225          |
| A600                                                              | Steam System and Power Generation                  | \$39,294,125                | \$72,718,808          |
| A700                                                              | Cooling Water and Other Utilities                  | \$4,612,103                 | \$9,284,507           |
| A800                                                              | Water Management                                   | \$6,847,760                 | \$16,068,002          |
| <b>Subtotal</b>                                                   |                                                    | <b>\$141,590,939</b>        | <b>\$286,139,871</b>  |
| Warehouse                                                         | 4.0% of ISBL                                       |                             | \$6,859,733           |
| Site Development                                                  | 10.0% of ISBL                                      |                             | \$17,149,333          |
| Additional Piping                                                 | 4.5% of ISBL                                       |                             | \$7,717,200           |
| <b>Total Direct Costs (TDC)</b>                                   |                                                    |                             | <b>\$317,866,137</b>  |
| Prorateable Expenses                                              | 10.0% of TDC                                       |                             | \$31,786,614          |
| Field Expenses                                                    | 10.0% of TDC                                       |                             | \$31,786,614          |
| Home Office & Construction Fee                                    | 20.0% of TDC                                       |                             | \$63,573,227          |
| Project Contingency                                               | 10.0% of TDC                                       |                             | \$31,786,614          |
| Other Costs (Start-Up, Permits, etc.)                             | 10.0% of TDC                                       |                             | \$31,786,614          |
| <b>Total Indirect Costs</b>                                       |                                                    |                             | <b>\$190,719,682</b>  |
| <b>Fixed Capital Investment (FCI)</b>                             |                                                    |                             | <b>\$508,585,820</b>  |
| Land                                                              |                                                    |                             | \$1,848,000           |
| Working Capital                                                   | 5.0% of FCI                                        |                             | \$25,429,291          |
| <b>Total Capital Investment (TCI)</b>                             |                                                    |                             | <b>\$535,863,111</b>  |

Table SI-20: Capital cost breakdown and factored estimates for the CFP-5 case

| <b>CFP-5 (2,000 tons/day): Total Capital Investment in 2020\$</b> |                                                    |                             |                       |
|-------------------------------------------------------------------|----------------------------------------------------|-----------------------------|-----------------------|
| <b>Process Area</b>                                               | <b>Description</b>                                 | <b>Purchased Equip Cost</b> | <b>Installed Cost</b> |
| A100                                                              | Feed Handling & Drying                             | \$281,697                   | \$551,866             |
| A200                                                              | Fast Pyrolysis & Vapor Upgrading                   | \$47,844,812                | \$114,602,939         |
| A300                                                              | Pyrolysis Vapor Quench & Liquid Chemicals Recovery | \$36,443,210                | \$56,405,795          |
| A500                                                              | Hydrogen Plant & Fuel Combustion                   | \$6,319,030                 | \$16,644,462          |
| A600                                                              | Steam System and Power Generation                  | \$9,900,822                 | \$24,473,915          |
| A700                                                              | Cooling Water and Other Utilities                  | \$4,612,325                 | \$9,285,013           |
| A800                                                              | Water Management                                   | \$6,850,161                 | \$16,074,281          |
| <b>Subtotal</b>                                                   |                                                    | <b>\$112,252,058</b>        | <b>\$238,038,270</b>  |
|                                                                   | Warehouse                                          | 4.0% of ISBL                | \$6,862,424           |
|                                                                   | Site Development                                   | 10.0% of ISBL               | \$17,156,060          |
|                                                                   | Additional Piping                                  | 4.5% of ISBL                | \$7,720,227           |
| <b>Total Direct Costs (TDC)</b>                                   |                                                    |                             | <b>\$269,776,981</b>  |
|                                                                   | Prorateable Expenses                               | 10.0% of TDC                | \$26,977,698          |
|                                                                   | Field Expenses                                     | 10.0% of TDC                | \$26,977,698          |
|                                                                   | Home Office & Construction Fee                     | 20.0% of TDC                | \$53,955,396          |
|                                                                   | Project Contingency                                | 10.0% of TDC                | \$26,977,698          |
|                                                                   | Other Costs (Start-Up, Permits, etc.)              | 10.0% of TDC                | \$26,977,698          |
| <b>Total Indirect Costs</b>                                       |                                                    |                             | <b>\$161,866,189</b>  |
| <b>Fixed Capital Investment (FCI)</b>                             |                                                    |                             | <b>\$431,643,170</b>  |
|                                                                   | Land                                               |                             | \$1,848,000           |
|                                                                   | Working Capital                                    | 5.0% of FCI                 | \$21,582,158          |
| <b>Total Capital Investment (TCI)</b>                             |                                                    |                             | <b>\$455,073,328</b>  |

Table SI-21: Capital cost breakdown and factored estimates for the **CFP-6** case

| <b>CFP-6 (2,000 tons/day): Total Capital Investment in 2020\$</b> |                                                    |                             |                       |
|-------------------------------------------------------------------|----------------------------------------------------|-----------------------------|-----------------------|
| <b>Process Area</b>                                               | <b>Description</b>                                 | <b>Purchased Equip Cost</b> | <b>Installed Cost</b> |
| A100                                                              | Feed Handling & Drying                             | \$185,129                   | \$364,917             |
| A200                                                              | Fast Pyrolysis & Vapor Upgrading                   | \$48,872,707                | \$117,311,818         |
| A300                                                              | Pyrolysis Vapor Quench & Liquid Chemicals Recovery | \$37,708,260                | \$59,642,644          |
| A500                                                              | Hydrogen Plant & Fuel Combustion                   | \$143,755                   | \$370,349             |
| A600                                                              | Steam System and Power Generation                  | \$2,644,087                 | \$6,090,606           |
| A700                                                              | Cooling Water and Other Utilities                  | \$4,177,760                 | \$8,303,150           |
| A800                                                              | Water Management                                   | \$7,052,057                 | \$16,591,275          |
| <b>Subtotal</b>                                                   |                                                    | <b>\$100,783,755</b>        | <b>\$208,674,759</b>  |
|                                                                   | Warehouse                                          | 4.0% of ISBL                | \$7,092,775           |
|                                                                   | Site Development                                   | 10.0% of ISBL               | \$17,731,938          |
|                                                                   | Additional Piping                                  | 4.5% of ISBL                | \$7,979,372           |
| <b>Total Direct Costs (TDC)</b>                                   |                                                    |                             | <b>\$241,478,845</b>  |
|                                                                   | Prorateable Expenses                               | 10.0% of TDC                | \$24,147,884          |
|                                                                   | Field Expenses                                     | 10.0% of TDC                | \$24,147,884          |
|                                                                   | Home Office & Construction Fee                     | 20.0% of TDC                | \$48,295,769          |
|                                                                   | Project Contingency                                | 10.0% of TDC                | \$24,147,884          |
|                                                                   | Other Costs (Start-Up, Permits, etc.)              | 10.0% of TDC                | \$24,147,884          |
| <b>Total Indirect Costs</b>                                       |                                                    |                             | <b>\$144,887,307</b>  |
| <b>Fixed Capital Investment (FCI)</b>                             |                                                    |                             | <b>\$386,366,152</b>  |
|                                                                   | Land                                               |                             | \$1,848,000           |
|                                                                   | Working Capital                                    | 5.0% of FCI                 | \$19,318,308          |
| <b>Total Capital Investment (TCI)</b>                             |                                                    |                             | <b>\$407,532,459</b>  |

#### 4. Unit price assumptions for energy products

Most of our cost assumptions were inherited from our 2020 State of Technology report for CFP (NREL/TP-5100-80291, <https://www.nrel.gov/docs/fy21osti/80291.pdf>). It is however important to note that energy prices have gone through significant swings during the last few years; considering that, we explicitly state unit price assumptions for key energy byproducts that impact our analysis, noting that many of those prices move in tandem based on energy demand-supply situations, including disruptions. The table below will allow the interested reader to use a different set of assumptions and estimate prorated impacts using the breakdowns in the MSP breakdown tables presented in Section 2 above.

*Table SI-22: Energy unit cost assumptions*

| <b>Energy Utility</b> | <b>Unit Price* (2020\$)</b> |
|-----------------------|-----------------------------|
| Electricity           | \$0.059/kWh                 |
| Fuel Gas/Natural Gas  | \$2.625/million Btu         |
| Steam                 | \$3/1000 lb                 |
| Purchased Hydrogen    | \$0.74/lb                   |
| Sold Hydrogen         | \$0.68/lb                   |

## 5. Inventory for lifecycle analysis

Table SI-23: Major contributors to lifecycle inventory for 2000 dry metric tonnes/day standalone FP cases. Transportation distances for feedstock and bio-oil become 800 miles and 0 miles respectively in the colocated cases. Minor contributors are not included in this table; order of magnitudes of minor contributors can be found in our previous publication (NREL/TP-5100-80291, <https://www.nrel.gov/docs/fy21osti/80291.pdf>)

| <b>Units are in lb/h unless otherwise noted in row caption</b> | <b>FP-1</b>       | <b>FP-2</b>       | <b>FP-3</b>       |
|----------------------------------------------------------------|-------------------|-------------------|-------------------|
| <b>Products</b>                                                | lb/h              | lb/h              | lb/h              |
| Bio-Oil Intermediate                                           | 136,511           | 136,511           | 136,511           |
| Other Liquid Products                                          |                   |                   |                   |
| Total                                                          | 136,511           | 136,511           | 136,511           |
| <b>By-products</b>                                             |                   |                   |                   |
| Biogenic fuel gas ( <b>million Btu/h</b> , LHV basis)          | 0                 | 0                 | 88                |
| Exported steam (1321 psi, 1000F)                               | 0                 | 82,717            | 7,563             |
| Excess electricity, positive is export ( <b>kW</b> )           | -6,127            | -16,037           | -15,288           |
| <b>Biorefinery Resource Consumption</b>                        | lb/h              | lb/h              | lb/h              |
| Blended woody biomass (wet)                                    | 204,131           | 204,131           | 204,131           |
| Blended woody biomass (dry)                                    | 183,718           | 183,718           | 183,718           |
| Biomass wet transportation (0 miles)                           | 204,131           | 204,131           | 204,131           |
| Sand makeup                                                    | 157               | 157               | 157               |
| 50 wt% Caustic                                                 | 231               | 231               | 231               |
| Net Water Makeup                                               | 59,594            | 59,648            | 58,556            |
| Bio-Oil Transportation (800 miles)                             | 136,511           | 136,511           | 136,511           |
| No. 2 diesel fuel                                              | 71                | 71                | 71                |
| <b>Waste Streams</b>                                           | lb/h              | lb/h              | lb/h              |
| Solids purge from fluidized bed reactors                       | 3,751             | 3,751             | 3,751             |
| Wastewater                                                     | 15,014            | 15,016            | 15,226            |
| <b>Air Emissions</b>                                           | lb/h              | lb/h              | lb/h              |
| CO2 (Fossil)                                                   | 0                 | 0                 | 0                 |
| CO2 (Biogenic)                                                 | 88,929            | 88,929            | 53,921            |
| CH4                                                            | 0                 | 0                 | 0                 |
| CO                                                             | 0                 | 0                 | 0                 |
| NO2                                                            | 5                 | 5                 | 0                 |
| SO2                                                            | 84                | 84                | 84                |
| H2O                                                            | 82,281            | 82,333            | 75,333            |
| H2S                                                            | 0                 | 0                 | 0                 |
| <b>Combustor Feed Stream Heating Values</b>                    | % Carbon Biogenic | % Carbon Biogenic | % Carbon Biogenic |
| Char Combustor                                                 | 100.0%            | 100.0%            | 100.0%            |
| Reformer Fuel Combustor                                        | 100.0%            | 100.0%            | 100.0%            |

Table SI-24: Major contributors to lifecycle inventory for 2000 dry metric tonnes/day standalone CFP cases. Transportation distances for feedstock and bio-oil become 800 miles and 0 miles respectively in the colocated cases. Minor contributors are not included in this table; order of magnitudes of minor contributors can be found in our previous publication (NREL/TP-5100-80291, <https://www.nrel.gov/docs/fy21osti/80291.pdf>)

| <b>Units are in lb/h unless otherwise noted in row caption</b> | <b>CFP-1</b>      | <b>CFP-2</b>      | <b>CFP-3</b>      | <b>CFP-4</b>      | <b>CFP-5</b>      | <b>CFP-6</b>      |
|----------------------------------------------------------------|-------------------|-------------------|-------------------|-------------------|-------------------|-------------------|
| <b>Products</b>                                                | lb/h              | lb/h              | lb/h              | lb/h              | lb/h              | lb/h              |
| Bio-Oil Intermediate                                           | 44,130            | 44,130            | 44,130            | 44,130            | 44,130            | 44,130            |
| Other Liquid Products                                          |                   |                   |                   |                   |                   |                   |
| Total                                                          | 44,130            | 44,130            | 44,130            | 44,130            | 44,130            | 44,130            |
| <b>By-products</b>                                             |                   |                   |                   |                   |                   |                   |
| Exported hydrogen (pure H2 basis)                              | 3                 | 2,994             | 4,123             | 0                 | 0                 | 0                 |
| Biogenic fuel gas (million Btu/h, LHV basis)                   | 0                 | 0                 | 0                 | 0                 | 0                 | 623               |
| Exported steam (1321 psi, 1000F)                               | 0                 | 0                 | 224,446           | 0                 | 521,693           | 71,014            |
| Excess electricity, positive is export (kW)                    | 18,190            | -32               | -34,126           | 35,441            | -29,814           | -25,043           |
| MEK                                                            | 926               | 926               | 926               | 926               | 926               | 926               |
| Acetone                                                        | 5,336             | 5,336             | 5,336             | 5,336             | 5,336             | 5,336             |
| <b>Biorefinery Resource Consumption</b>                        | lb/h              | lb/h              | lb/h              | lb/h              | lb/h              | lb/h              |
| Blended woody biomass (wet)                                    | 204,131           | 204,131           | 204,131           | 204,131           | 204,131           | 204,131           |
| Blended woody biomass (dry)                                    | 183,718           | 183,718           | 183,718           | 183,718           | 183,718           | 183,718           |
| Biomass wet transportation (0 miles)                           | 204,131           | 204,131           | 204,131           | 204,131           | 204,131           | 204,131           |
| Sand makeup                                                    | 159               | 159               | 159               | 159               | 159               | 159               |
| Fixed-Bed VPU Catalyst (0.5% Pt/TiO2)                          | 14                | 14                | 14                | 14                | 14                | 14                |
| 50 wt% Caustic                                                 | 231               | 231               | 231               | 231               | 231               | 231               |
| Net Water Makeup                                               | 52,226            | 72,707            | 80,558            | 37,551            | 37,643            | 31,958            |
| Purchased hydrogen (pure H2 basis)                             | 0                 | 0                 | 0                 | 3,235             | 3,235             | 3,235             |
| Bio-Oil Transportation (800 miles)                             | 44,130            | 44,130            | 44,130            | 44,130            | 44,130            | 44,130            |
| No. 2 diesel fuel                                              | 71                | 71                | 71                | 71                | 71                | 71                |
| <b>Waste Streams</b>                                           | lb/h              | lb/h              | lb/h              | lb/h              | lb/h              | lb/h              |
| Solids purge from fluidized bed reactors                       | 3,742             | 3,742             | 3,742             | 3,742             | 3,742             | 3,742             |
| Wastewater                                                     | 17,215            | 19,729            | 20,661            | 14,450            | 14,455            | 15,987            |
| <b>Air Emissions</b>                                           | lb/h              | lb/h              | lb/h              | lb/h              | lb/h              | lb/h              |
| CO2 (Fossil)                                                   | 0                 | 0                 | 0                 | 0                 | 0                 | 0                 |
| CO2 (Biogenic)                                                 | 204,023           | 203,298           | 203,026           | 204,808           | 204,808           | 67,957            |
| CH4                                                            | 0                 | 0                 | 0                 | 0                 | 0                 | 0                 |
| CO                                                             | 0                 | 0                 | 0                 | 0                 | 0                 | 0                 |
| NO2                                                            | 18                | 18                | 18                | 18                | 18                | 0                 |
| SO2                                                            | 84                | 84                | 84                | 84                | 84                | 84                |
| H2O                                                            | 131,297           | 119,997           | 115,892           | 151,134           | 151,221           | 74,529            |
| H2S                                                            | 0                 | 0                 | 0                 | 0                 | 0                 | 0                 |
| <b>Combustor Feed Stream Heating Values</b>                    | % Carbon Biogenic |
| Char Combustor                                                 | 100.0%            | 100.0%            | 100.0%            | 100.0%            | 100.0%            | 100.0%            |
| Reformer Fuel Combustor                                        | 100.0%            | 100.0%            | 100.0%            | 100.0%            | 100.0%            | 100.0%            |

## 6. Assumptions for key emission factors

Key emission factors for feedstock, transportation, and energy byproducts that are the primary subjects of this analysis are shown below. Most of the values were sourced or derived from GREET2020 (2020 version of GREET <https://greet.es.anl.gov/>). The table below will allow the interested reader to use a different set of emission factor assumptions and estimate prorated impacts using the breakdowns in the GHG contribution tables presented in Section 1 above.

*Table SI-25: Key emission factors used in the analysis*

| <b>Contributor/Displacer</b> | <b>GHG Emission Factor Used</b>         | <b>Source/Basis</b>                                                                                                                                                                                                              |
|------------------------------|-----------------------------------------|----------------------------------------------------------------------------------------------------------------------------------------------------------------------------------------------------------------------------------|
| Feedstock (ready for plant)  | 251 kg CO <sub>2</sub> e/dry ton        | <ul style="list-style-type: none"> <li>•GREET2020</li> <li>•Blended biomass with 50% clean pine and 50% forest residues.</li> </ul>                                                                                              |
| Transportation (800 miles)   | 0.011467 kg CO <sub>2</sub> e/dry lb    | <ul style="list-style-type: none"> <li>•GREET2020</li> <li>•Trip from biomass depot to destination by diesel rail with energy intensity of 272 Btu/ton-mile.</li> </ul>                                                          |
| Electricity                  | 0.4490 kg CO <sub>2</sub> e/kWh         | <ul style="list-style-type: none"> <li>•GREET2020</li> <li>•Average U.S. Mix</li> </ul>                                                                                                                                          |
| Fuel Gas (for combustion)    | 70.760 kg CO <sub>2</sub> e/million Btu | <ul style="list-style-type: none"> <li>•GREET2020</li> <li>•Including emissions for NG production and transmission (11.215 kg CO<sub>2</sub>e/million Btu) and NG combustion (59.544 kg CO<sub>2</sub>e/million Btu).</li> </ul> |
| Steam                        | 0.0943 kg CO <sub>2</sub> e/lb          | <ul style="list-style-type: none"> <li>•Estimate</li> <li>•150 psi steam produced from NG boiler with an efficiency of 82% and using NG fuel emission factor of 70.76 kg CO<sub>2</sub>e/million Btu.</li> </ul>                 |
| Hydrogen                     | 5.2227 kg CO <sub>2</sub> e/lb          | <ul style="list-style-type: none"> <li>•GREET2020</li> <li>•Gaseous hydrogen from natural gas</li> </ul>                                                                                                                         |
